# Supplementary material for: The Presence of Treponema spp. in Equine Hoof Canker Biopsies and Skin Samples from Bovine Digital Dermatitis Lesions
Source: Microorganisms. 2021 Oct 20;9(11):2190. doi: 10.3390/microorganisms9112190 (PMC8625648; doi:10.3390/microorganisms9112190)
Supplement: Supplementary file 1 [file microorganisms-09-02190-s001.zip › Supplementary material Figure S1-S3.pdf]

AAACTACGGACATTATGCAGAGAATCAGGGAGTTGGCCGTTCAAGCTTCTAACGGTAT  
TTATTCCGCAGAAGACAGAATGCAAATTCAAGTTGAAGTTTCTCAGCTGGTTGCTGAA  
GTTGACCGCATTGCAAGTTCCGCACAATTTAACGGAATGAATATGCTTACGGGCCGCT  
TTGCACGTGAGACCGGTGAAAACGTTGTTACCGCTTCCATGTGGTTCCACATCGGTGC  
AAACATGGACCAAAGAATGCGCGTTTACATCGGAACAATGTCGGCTGCAGCCGTAGG  
AATTCGCGAAATCGGTTTCGGAAAAGATTATGACAATCGAACTGCCGATTCCGCCAAT  
ATGAGCATCGGAACGATTGATGAAGGCTTAAAGAAAATCAATAAGCAAAGAGCGGAC  
CTCGGAGCTTACCAGAACAGAATGGAACTTACGGTTGTAGGA

**Figure S1** The consensus sequence of *flaB2* gene obtained after sequencing and assembling *Treponema pedis* DSM 18691 as a positive control.

TTTTATTCAAGTTGCGGAAGCTTTCCTTCAGGAACTACAGATGTTATCCAGAGAATCC  
GCGAACTCAGCATTCACTCTTAACGGTATTTACTCGGCAGAAGACAGATTGTACATT  
CAGGTTGAAGTATCTCAGCTAATCGCTGAAGTAGACCGAATTGCAAGCCATGCACAGT  
TCAACGGTATGAATATGCTTACCGGAAGATTTGCTCAAGAAACCGGAGAAAATACCGT  
AACTGCTTCTATGTGGTTCCACATCGGTGCCAACATGGATCAGAGAACAAGAGCTTAC  
ATTGGAACAATGACAGCTAAGGCTCTCGGCGTTTCGCAATATCGGAGATGAATCGATTA  
TGACTATCGAAACACCCGAAAAAGCTAACCGCGCTATCGGTACCCTTGATGAAGCCAT  
CAAGAAGATCAACAAGCAAAGAGCCGACCTTGGTGCATACCAG

**Figure S2** The consensus sequence of *flaB2* gene obtained after sequencing and assembling *Treponema denticola* DSM 14222 as a positive control.

CTGGCAGTAGGGGTTGCGCTCGTTGCGGGACTTAACCCAACACCTCACGGCACGAGC  
TGACGACAGCCATGCAGCACCTGTATACCGGCGTATTGCTACGCTCTGTTGTCTCCAAC  
ACATTCCAGTATATGTCAAACCCAGGTAAGGTTCTCGCGTACCATCGAATTAAACCAC  
ATGCTCCACCGCTTGTGCGGGCCCCCGTCAATTCCTTTGAGTTTCACCCTTGCGGGCAT  
ACTTCCCAGGCGGTACACTTATCACGTTTGCTTTGGCACCCAGTCTCTTGACCAGACA  
CCTAGTGTACATCGTTTACTGTGCGGACTACCAGGGTATCTAATCCTGTTGCTCCCCG  
CACCTTCGCACCTCAGCGTCAGTTATCTGCCTGAAACTTGCCTTCGCCATTGGTGTCT  
TCCAGATATCTACAGATTTACCCCTACACCTGGAATTCCAGTTTCACTTCAGTAACTCT  
AGTCTTATAGTTCTCAATGCGGTTCCGGGGTTGAGCCCCGGGATTTACACCAAGCTT  
GCAAAACTGCCTACATGCCCTTTACGCCCAATAATTCCGAACAACGCTCGCAACTTACG  
TGTTACCGCGGCTGCTGGCACGTAATTAGCCGTTGCTTATTCAAAACCTACT

**Figure S3** The consensus sequence of 16S rRNA gene obtained after sequencing and assembling *Treponema brennaborens* DSM 12168 as a positive control.
